# Supplementary material
Source: Springer Nature journal article supplement (https://www.springermedizin.de/resource/supplementary/12936_2010_1447_MOESM6_ESM.pdf/9549830)

*An. gambiae* s.s.

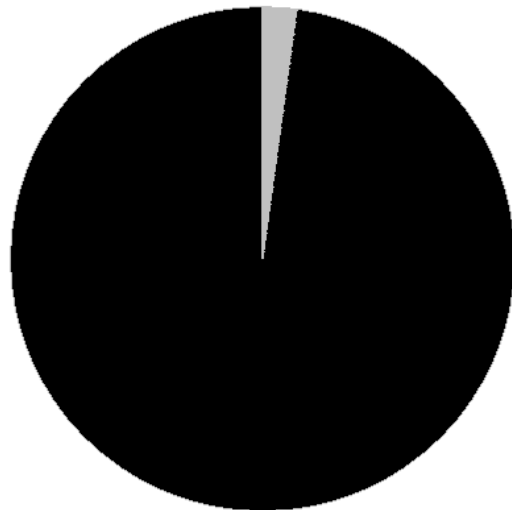

n = 139

*An. arabiensis*

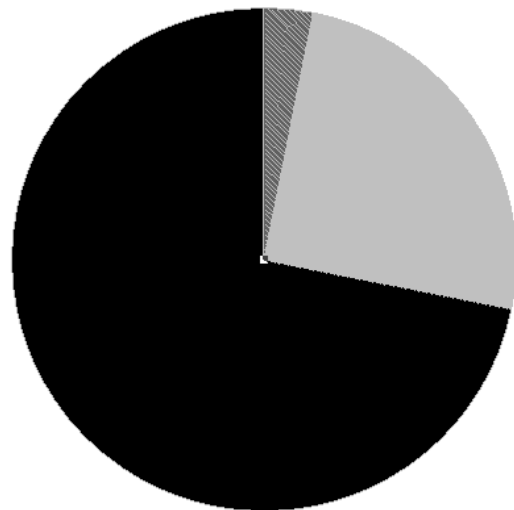

n = 32

■ Human  
■ Cow  
▨ Dog/Human

Supplement: MOESM6 [file 9549830]
